# Supplementary material for: Availability of technology for managing cancer patients in the Southeast European (SEE) region
Source: PubMed Central journal article supplement — Clin Transl Radiat Oncol. 2022 Mar 16;34:57–66. doi: 10.1016/j.ctro.2022.03.004 (PMC8956881; doi:10.1016/j.ctro.2022.03.004), 2022-03-16
Supplement: mmc3.pdf [file mmc3.pdf]

# QUESTIONNAIRE FOR REGULATORS – Diagnostics and Cancer Treatment Equipment in the Countries of the SEE Region

NOTE: This questionnaire has been designed for better understanding the cancer treatment in the SEE region and estimation the number of patients who will benefit from the particle therapy (PT) that will be accessible in the upcoming particle treatment center for the Southeast European Countries “SEEIIST” ([seeiist.eu](http://seeiist.eu)). This survey is a part of the EC project-2019/20. This survey has been designed as a part of an EC project attributed to the development of SEEIIST facility by the following team: Manjit Dosanjh (CERN, SEEIIST), Mimoza Ristova (UKIM-Skopje, SEEIIST, CERN), Petya Georgieva (SEEIIST, TERA), Vesna Gershan (UKIM-Skopje).

---

For any question, please contact Manjit Dosanjh ([manjit.dosanjh@cern.ch](mailto:manjit.dosanjh@cern.ch))

\* Required

1. Email address \*

---

2. Name \*

---

### 3. Country \*

*Mark only one oval.*

- Albania
- Bosnia and Hezegovina
- Bulgaria
- Croatia
- Greece
- Kosovo\*
- Montenegro
- North Macedonia
- Serbia
- Slovenia

### 4. Name of the Institution/University/Regulatory body \*

---

### 5. Source of data (if public please cite the website)

---

## Part 1. DIAGNOSTICS IN YOUR COUNTRY

Diagnostic and diagnostic-supporting machines that are currently available in your country

6. How many Computerized Tomography (CT) units? \*

---

7. How many SPECT/CT units? \*

---

8. How many mammography units?

---

9. How many digital mammography units?

---

## Part II. CANCER TREATMENT IN YOUR COUNTRY

Radiation Therapy (RT) machines available in your country (if you don't know please write "NN" as an answer.

10. How many Cobalt units?

---

11. How many Linear Accelerator (LINAC) units?

---

12. How many of the LINACS are equipped with the intensity-modulated unit (IMRT)?

---

13. How many of the LINACS are equipped with a volumetric modulated arc therapy unit (VMAT)?

---

14. How many Brachytherapy units?

---

15. Are there any isotope treatments available in your country (such as I-131 for the thyroid gland tumour or other)?

*Mark only one oval.*

Yes

No

Maybe

### Part III. TREATMENT PLANNING IN YOUR COUNTRY

16. What is the number of CT simulators in your country? (to the best of your knowledge)

---

#### Part IV. RADIATION PROTECTION

Available dosimeter technologies which are used for RT staff members in your country

17. What kind of ambient dosimeters are used in the RT rooms? (select multiple if applicable) \*

*Check all that apply.*

- Electronic Dosimeter
- Quartz fiber dosimeter
- I don't know

Other:  \_\_\_\_\_

18. What kind of personal dosimeters are used for RT staff members? (select multiple if applicable) \*

*Check all that apply.*

- Electronic Personal Dosimeter
- Thermoluminescent dosimeter (TLD)
- Film badge dosimeter
- I don't know

Other:  \_\_\_\_\_

#### PART 5: Radiation protection training in your country

19. Are there any institutions in your country that offer General radiation and protection training courses (awarding certificates for licensing purposes) dedicated to professionally exposed personnel to ionizing radiation?

*Mark only one oval.*

- Yes
- No
- I don't know

20. Are there any institutions in your country that offer Specialized protection training courses for high energy particles (awarding certificates for licensing purposes) dedicated to professionally exposed personnel working with accelerator technologies?

*Mark only one oval.*

- Yes
- No
- I don't know

21. What kind of institution/company is offering radiation protection training courses for the professionally exposed in your country? (To the best of your knowledge)

*Mark only one oval.*

- Public higher educational/research
- Private educational
- Private comercial
- I don't know

#### PART VI. Education in radiation therapy in your country

22. Are there any higher educational institutions offering BSc curricula in Medical Physics in your country?

*Mark only one oval.*

- Yes
- No
- Maybe

23. To the best of your knowledge please answer which higher education institution/s hold accreditation for BSc in Medical Physics in your country?
-

24. To the best of your knowledge, please answer whether there is a curriculum in the clinical specialization of medical physics offered in your country?

*Mark only one oval.*

- Yes  
 No  
 Maybe

25. Are there any higher educational institutions offering MSc curricula in Medical Physics in your country?

*Mark only one oval.*

- Yes  
 No  
 Maybe

26. Are there any higher educational institutions offering radiotherapy courses in the Doctoral studies in your country?

*Mark only one oval.*

- Yes  
 No  
 Maybe



27. To the best of your knowledge are there any hadron (particle) therapy topics offered within the radiotherapy courses at any higher educational cycle in your country?

*Mark only one oval.*

Yes

No

Maybe

---

This content is neither created nor endorsed by Google.

Google Forms
