# Supplementary material for: Availability of technology for managing cancer patients in the Southeast European (SEE) region
Source: PubMed Central journal article supplement — Clin Transl Radiat Oncol. 2022 Mar 16;34:57–66. doi: 10.1016/j.ctro.2022.03.004 (PMC8956881; doi:10.1016/j.ctro.2022.03.004), 2022-03-16
Supplement: mmc4.pdf [file mmc4.pdf]

# Questionnaire for the ONCOLOGISTS from the countries of the SEE Region

IMPORTANT NOTE 1: Each designated participant who will contribute with relevant answers to this questionnaire will become a co-author of a joint scientific publication.

IMPORTANT NOTE 2: This questionnaire has been designed for better understanding the cancer treatment in the SEE region and estimation the number of patients who will benefit from the particle therapy (PT) that will be accessible in the upcoming particle treatment center for the Southeast European Countries "SEEIIST" ([seeiist.eu](http://seeiist.eu)). This survey is a part of an EC project attributed to the development of SEEIIST facility, designed by the following team: Vladimir Todorovic MD (SEEIIST, Clinical Center of Podgorica) as a task leader, Manjit Dosanjh (CERN, SEEIIST), Mimoza Ristova (UKIM-Skopje, SEEIIST, CERN), Petya Georgieva (SEEIIST, TERA), Vesna Gershan (UKIM-Skopje).

---

For any question, please contact Manjit Dosanjh ([manjit.dosanjh@cern.ch](mailto:manjit.dosanjh@cern.ch))

\* Required

1. Email address \*

---

Part I. Contributor to the data

2. Name:

---

### 3. Country

*Mark only one oval.*

- Albania
- Bosnia and Herzegovina
- Bulgaria
- Croatia
- Greece
- Kosovo
- Montenegro
- North Macedonia
- Serbia
- Slovenia
- Other: \_\_\_\_\_

### 4. Affiliation:

\_\_\_\_\_

5. Do you have a cancer patient registry? (click all that applies)

*Mark only one oval.*

- Yes, on institutional level.
- Yes, on a national level.
- No
- Don't know

## Part II: Cancer patients in your country

PLEASE RESPOND TO THE FOLLOWING QUESTIONS BY CONSULTING THE ACCESSIBLE COUNTRY STATISTICS  
In case you are unable to provide the answer, please select "Don't know"

6. What is the number of new cancer patients in your country that were registered last year?

---

7. What is the mortality of the cancer patients according to your last available statistics in your country?

---

8. What is the mortality of the cancer patients that have been treated with radiotherapy (RT) according to your last available statistics in your country?

---

9. Which are the top 11 most frequent types of cancer in your country? (click 1 for cancer with the highest incidence)

*Mark only one oval per row.*

|                    | 1                     | 2                     | 3                     | 4                     | 5                     | 6                     | 7                     | 8                     | 9                     | 10                    | 11                    |
|--------------------|-----------------------|-----------------------|-----------------------|-----------------------|-----------------------|-----------------------|-----------------------|-----------------------|-----------------------|-----------------------|-----------------------|
| Lung               | <input type="radio"/> |
| Breast             | <input type="radio"/> |
| Colorectal         | <input type="radio"/> |
| Skin               | <input type="radio"/> |
| Stomach            | <input type="radio"/> |
| Liver              | <input type="radio"/> |
| Head and neck      | <input type="radio"/> |
| Brain              | <input type="radio"/> |
| Prostate           | <input type="radio"/> |
| Cervix and uterine | <input type="radio"/> |
| Urinary tract      | <input type="radio"/> |

10. What are the cancer treatment options available in your country? (click all that apply)

*Check all that apply.*

- Chemotherapy
- Radiotherapy
- Immunotherapy
- Gene therapy
- Hormonal therapy
- Targeted drug therapy
- Crioablation

### Part III. Diagnostic machines available in your country

11. How many CT machines are available in your country? (to the best of your knowledge)

---

12. How many MRI machines are available in your country? (to the best of your knowledge)

---

13. How many PET machines are available in your country? (to the best of your knowledge)

---

14. How many PET/CT machines are available in your country? (to the best of your knowledge)

---

15. How many GAMMA-cameras are available in your country? (to the best of your knowledge)

---

16. How many Mammography units are available in your country? (to the best of your knowledge)

---

#### Part IV. Radiation Therapy (RT) machines available in your country

17. How many LINAC units for Radiation Therapy are available in your country?

---

18. How many Cobalt units for Radiation Therapy are available in your country?

---

19. How many Brachytherapy units are available in your country?

---

20. How many Ortovoltage RT units are available in your country?

---

### Part V. Cancer patients in your country

This section should be filled up by consulting the country statistics.  
If you are unable to provide the relevant answer, please write "NA"

21. What is the number of patients who have been diagnosed with cancer in your country for the last 5 years?

---

22. What is the number of new patients have been diagnosed with cancer in your country the last year?

---

23. What is the number of cancer patients in your country that were treated only with RT the last year?

---

24. What is the number the patients treated only by chemotherapy last year in your country?

---

25. What is the number of patients treated with non-RT methods last year in your country?

---

26. What is the number of patients treated with synergic therapy including RT last year in your country?

---

27. What is the number of patients who didn't undergo any clinical cancer treatment last year in your country?

---

28. Is there a special department for pediatric oncology in your country?

*Mark only one oval.*

Yes

No

29. Are there RT devices or protocols for treating children in your country?

*Mark only one oval.*

Yes

No



30. Is there a radiotherapist who is specialized for children in your country?

*Mark only one oval.*

Yes

No

31. How many cancer patients could benefit from PT in your country? (please make your own scientifically based estimation or write "NA")

---

#### Part VI: Equipment for cancer treatment in your institution

32. How many RT machines are there in your institution?

---

33. How many LINACs are there in your institution?

---

34. Do you have a CT simulator in your institution?

*Mark only one oval.*

Yes

No

35. Is stereotactic biopsy practiced in your institution?

*Mark only one oval.*

Yes

No

36. Is stereotactic surgery practiced in your institution?

*Mark only one oval.*

Yes

No

37. Do you have a QA technology in your institution?

*Mark only one oval.*

Yes

No

38. What kind of dosimetry devices are used by the RT staff members?

*Check all that apply.*

Electronic Personal Dosimeter

MOSFET Dosimeter

Thermoluminescent Dosimeter (TLD)

Film-badge Dosimeter

Quartz-fiber Dosimeter

I don't know

39. Does your institution/clinic participate in clinical trials for novel treatments?

*Mark only one oval.*

Yes

No

40. If your answer to the previous question is "Yes", then what kind of trials?

---

### Part VII. Cancer patients in your institution

41. What is the total number of cancer patients who are currently treated in your institution?

---

42. What is the total number of cancer patients who were treated last year at your institution?

---

43. What is the number of the above patients that have been currently treated only with RT at your institution?

---

44. What is the number the patients that were treated only by chemotherapy last year at your institution?

---

45. What is the number of patients who were last year treated with non-RT methods at your institution?

---

46. What is the number of patients who were last year treated with synergic therapy including RT at your institution?

---

47. What is the number of patients who doesn't undergo any clinical cancer treatment? (including those who refuse medical treatment)

---

48. Is there a pediatric oncology department in your institution?

*Mark only one oval.*

Yes

No

49. Are there RT devices or protocols for treating children in your institution?

*Mark only one oval.*

Yes

No

50. Is there a specialized radiotherapist only for children in your institution?

*Mark only one oval.*

Yes

No

51. Are their protocols and devices for RT treatment of children in your institution?

*Mark only one oval.*

Yes

No

52. Is there a specialized radiotherapist only for children at your institution?

*Mark only one oval.*

Yes

No

53. Is there a multidisciplinary board for making a decision on the treatment of each lung cancer patient at your institution?

*Mark only one oval.*

Yes

No

54. Is there a multidisciplinary board for making a decision on the treatment of each head and neck cancer patient at your institution?

*Mark only one oval.*

Yes

No

55. Is there a multidisciplinary board for making a decision on the treatment of each brain tumour patient?

*Mark only one oval.*

Yes

No

56. How many cancer patients from your institution have been referred to cancer treatment outside the country?

---

57. How many cancer patients are coming to your institution to seek treatment from outside the country?

---

---

This content is neither created nor endorsed by Google.

Google Forms
